# Supplementary material for: Growth Charts for Shwachman–Diamond Syndrome at Ages 0 to 18 Years
Source: MDPI journal article supplement (doi:10.3390/cancers16071420), 2024-04-05
Supplement: s1 [file s1]

# Supplementary information

## Growth Charts for Shwachman-Diamond Syndrome at ages 2 to 18 years

Anna Pegoraro, Valentino Bezzetti, Gloria Tridello, Cecilia Brignole, Francesca Lucca, Emily Pintani, Cesare Danesino, Simone Cesaro, Francesca Fioredda, and Marco Cipolli

**Table S1.** Number of patients and assessments.

| Variable              | Age (years) | M   | F   | Total |
|-----------------------|-------------|-----|-----|-------|
| Number of patients    |             |     |     |       |
| Age                   |             |     |     |       |
|                       | 0–2         | 62  | 43  | 105   |
|                       | 3–4         | 35  | 20  | 55    |
|                       | 5–6         | 28  | 22  | 50    |
|                       | 7–8         | 28  | 25  | 53    |
|                       | 9–10        | 26  | 20  | 46    |
|                       | 11–12       | 24  | 15  | 39    |
|                       | 13–14       | 22  | 11  | 33    |
|                       | 15–18       | 23  | 14  | 37    |
| Number of assessments |             |     |     |       |
| Weight                |             |     |     |       |
|                       | 0–2         | 147 | 102 | 249   |
|                       | 3–4         | 58  | 28  | 86    |
|                       | 5–6         | 47  | 32  | 79    |
|                       | 7–8         | 39  | 33  | 72    |
|                       | 9–10        | 38  | 26  | 64    |
|                       | 11–12       | 31  | 17  | 48    |
|                       | 13–14       | 28  | 14  | 42    |
|                       | 15–18       | 44  | 23  | 67    |
| Height                |             |     |     |       |
|                       | 0–2         | 132 | 87  | 219   |
|                       | 3–4         | 56  | 28  | 84    |
|                       | 5–6         | 46  | 31  | 77    |
|                       | 7–8         | 39  | 32  | 71    |
|                       | 9–10        | 37  | 25  | 62    |
|                       | 11–12       | 31  | 17  | 48    |

|                 |       |     |    |     |
|-----------------|-------|-----|----|-----|
|                 | 13-14 | 28  | 14 | 42  |
|                 | 15-18 | 44  | 22 | 66  |
| Body mass index |       |     |    |     |
|                 | 0-2   | 132 | 87 | 219 |
|                 | 3-4   | 56  | 28 | 84  |
|                 | 5-6   | 46  | 31 | 77  |
|                 | 7-8   | 39  | 32 | 71  |
|                 | 9-10  | 37  | 25 | 62  |
|                 | 11-12 | 31  | 17 | 48  |
|                 | 13-14 | 28  | 14 | 42  |
|                 | 15-18 | 44  | 22 | 66  |

M, males; F, females.

**Table S2.** Measurements of 3<sup>rd</sup>, 25<sup>th</sup>, 50<sup>th</sup>, 75<sup>th</sup> and 97<sup>th</sup> percentiles for height, weight, and BMI in the study population.

|      | Height |       |       |        |        |         |       |       |        |        |
|------|--------|-------|-------|--------|--------|---------|-------|-------|--------|--------|
|      | Males  |       |       |        |        | Females |       |       |        |        |
| Age  | C3     | C25   | C50   | C75    | C97    | C3      | C25   | C50   | C75    | C97    |
| 0.00 | 40.71  | 45.61 | 48.14 | 50.55  | 54.60  | 39.53   | 43.90 | 46.31 | 48.71  | 52.95  |
| 0.25 | 45.21  | 50.56 | 53.32 | 55.94  | 60.36  | 43.42   | 48.25 | 50.89 | 53.48  | 58.04  |
| 0.50 | 49.53  | 55.28 | 58.24 | 61.06  | 65.80  | 47.21   | 52.50 | 55.35 | 58.13  | 62.97  |
| 0.75 | 53.57  | 59.68 | 62.83 | 65.82  | 70.85  | 50.86   | 56.59 | 59.64 | 62.61  | 67.71  |
| 1.00 | 57.27  | 63.70 | 67.00 | 70.14  | 75.42  | 54.33   | 60.48 | 63.73 | 66.85  | 72.18  |
| 1.25 | 60.64  | 67.33 | 70.77 | 74.03  | 79.51  | 57.58   | 64.14 | 67.56 | 70.82  | 76.35  |
| 1.50 | 63.68  | 70.58 | 74.13 | 77.50  | 83.15  | 60.58   | 67.52 | 71.10 | 74.49  | 80.18  |
| 1.75 | 66.39  | 73.47 | 77.11 | 80.56  | 86.35  | 63.30   | 70.60 | 74.31 | 77.81  | 83.64  |
| 2.00 | 68.80  | 76.03 | 79.74 | 83.26  | 89.15  | 65.74   | 73.36 | 77.19 | 80.78  | 86.71  |
| 2.25 | 70.96  | 78.30 | 82.07 | 85.64  | 91.62  | 67.93   | 75.85 | 79.78 | 83.45  | 89.45  |
| 2.50 | 72.91  | 80.36 | 84.17 | 87.78  | 93.83  | 69.92   | 78.11 | 82.13 | 85.86  | 91.92  |
| 2.75 | 74.72  | 82.24 | 86.10 | 89.75  | 95.85  | 71.73   | 80.19 | 84.29 | 88.06  | 94.15  |
| 3.00 | 76.40  | 84.00 | 87.90 | 91.58  | 97.73  | 73.41   | 82.11 | 86.28 | 90.08  | 96.21  |
| 3.25 | 77.98  | 85.66 | 89.58 | 93.30  | 99.49  | 74.97   | 83.90 | 88.14 | 91.98  | 98.11  |
| 3.50 | 79.49  | 87.24 | 91.19 | 94.93  | 101.17 | 76.45   | 85.61 | 89.90 | 93.77  | 99.91  |
| 3.75 | 80.94  | 88.76 | 92.75 | 96.51  | 102.80 | 77.87   | 87.25 | 91.59 | 95.48  | 101.62 |
| 4.00 | 82.36  | 90.25 | 94.27 | 98.07  | 104.39 | 79.24   | 88.83 | 93.22 | 97.13  | 103.27 |
| 4.25 | 83.76  | 91.72 | 95.78 | 99.61  | 105.98 | 80.55   | 90.35 | 94.78 | 98.71  | 104.83 |
| 4.50 | 85.16  | 93.21 | 97.31 | 101.17 | 107.59 | 81.80   | 91.80 | 96.27 | 100.21 | 106.33 |

|       |        |        |        |        |        |        |        |        |        |        |
|-------|--------|--------|--------|--------|--------|--------|--------|--------|--------|--------|
| 4.75  | 86.57  | 94.71  | 98.85  | 102.75 | 109.23 | 83.00  | 93.20  | 97.70  | 101.65 | 107.75 |
| 5.00  | 87.98  | 96.22  | 100.40 | 104.34 | 110.87 | 84.14  | 94.54  | 99.07  | 103.03 | 109.10 |
| 5.25  | 89.36  | 97.71  | 101.94 | 105.91 | 112.51 | 85.24  | 95.82  | 100.37 | 104.34 | 110.39 |
| 5.50  | 90.71  | 99.16  | 103.44 | 107.46 | 114.12 | 86.30  | 97.05  | 101.63 | 105.59 | 111.61 |
| 5.75  | 92.01  | 100.58 | 104.90 | 108.97 | 115.70 | 87.31  | 98.24  | 102.84 | 106.80 | 112.79 |
| 6.00  | 93.25  | 101.94 | 106.32 | 110.43 | 117.22 | 88.32  | 99.41  | 104.03 | 107.99 | 113.95 |
| 6.25  | 94.45  | 103.25 | 107.68 | 111.83 | 118.69 | 89.33  | 100.58 | 105.22 | 109.17 | 115.11 |
| 6.50  | 95.57  | 104.50 | 108.98 | 113.18 | 120.10 | 90.35  | 101.77 | 106.42 | 110.38 | 116.28 |
| 6.75  | 96.64  | 105.69 | 110.22 | 114.46 | 121.45 | 91.39  | 102.97 | 107.64 | 111.60 | 117.47 |
| 7.00  | 97.66  | 106.82 | 111.41 | 115.70 | 122.75 | 92.45  | 104.19 | 108.88 | 112.83 | 118.68 |
| 7.25  | 98.62  | 107.91 | 112.55 | 116.88 | 123.99 | 93.53  | 105.43 | 110.13 | 114.08 | 119.91 |
| 7.50  | 99.54  | 108.96 | 113.65 | 118.02 | 125.21 | 94.62  | 106.67 | 111.40 | 115.34 | 121.14 |
| 7.75  | 100.46 | 110.00 | 114.75 | 119.17 | 126.42 | 95.72  | 107.93 | 112.67 | 116.61 | 122.39 |
| 8.00  | 101.39 | 111.08 | 115.89 | 120.36 | 127.67 | 96.83  | 109.19 | 113.95 | 117.89 | 123.64 |
| 8.25  | 102.38 | 112.22 | 117.09 | 121.61 | 129.01 | 97.95  | 110.46 | 115.23 | 119.17 | 124.90 |
| 8.50  | 103.42 | 113.41 | 118.35 | 122.93 | 130.41 | 99.09  | 111.73 | 116.52 | 120.45 | 126.16 |
| 8.75  | 104.48 | 114.64 | 119.65 | 124.29 | 131.86 | 100.24 | 113.02 | 117.82 | 121.75 | 127.44 |
| 9.00  | 105.56 | 115.89 | 120.97 | 125.67 | 133.33 | 101.41 | 114.33 | 119.14 | 123.07 | 128.74 |
| 9.25  | 106.61 | 117.12 | 122.28 | 127.04 | 134.79 | 102.62 | 115.66 | 120.49 | 124.42 | 130.07 |
| 9.50  | 107.65 | 118.33 | 123.56 | 128.38 | 136.22 | 103.86 | 117.03 | 121.87 | 125.80 | 131.43 |
| 9.75  | 108.64 | 119.50 | 124.80 | 129.68 | 137.60 | 105.14 | 118.44 | 123.29 | 127.22 | 132.84 |
| 10.00 | 109.57 | 120.60 | 125.97 | 130.92 | 138.92 | 106.47 | 119.91 | 124.77 | 128.70 | 134.31 |
| 10.25 | 110.45 | 121.65 | 127.08 | 132.08 | 140.16 | 107.85 | 121.42 | 126.30 | 130.24 | 135.83 |
| 10.50 | 111.27 | 122.63 | 128.13 | 133.18 | 141.33 | 109.28 | 122.98 | 127.88 | 131.82 | 137.40 |
| 10.75 | 112.04 | 123.56 | 129.12 | 134.22 | 142.44 | 110.75 | 124.58 | 129.49 | 133.43 | 139.01 |
| 11.00 | 112.78 | 124.45 | 130.08 | 135.22 | 143.51 | 112.25 | 126.20 | 131.14 | 135.08 | 140.65 |
| 11.25 | 113.50 | 125.32 | 131.00 | 136.20 | 144.55 | 113.76 | 127.84 | 132.78 | 136.73 | 142.30 |
| 11.50 | 114.22 | 126.20 | 131.94 | 137.18 | 145.59 | 115.27 | 129.45 | 134.42 | 138.37 | 143.92 |
| 11.75 | 114.97 | 127.10 | 132.90 | 138.19 | 146.66 | 116.74 | 131.02 | 136.00 | 139.96 | 145.50 |
| 12.00 | 115.76 | 128.06 | 133.92 | 139.25 | 147.79 | 118.16 | 132.54 | 137.52 | 141.47 | 147.01 |
| 12.25 | 116.62 | 129.08 | 135.00 | 140.39 | 149.00 | 119.52 | 133.98 | 138.97 | 142.92 | 148.44 |
| 12.50 | 117.54 | 130.18 | 136.17 | 141.61 | 150.29 | 120.82 | 135.34 | 140.34 | 144.28 | 149.78 |
| 12.75 | 118.53 | 131.36 | 137.42 | 142.92 | 151.68 | 122.06 | 136.64 | 141.63 | 145.56 | 151.04 |
| 13.00 | 119.60 | 132.62 | 138.76 | 144.32 | 153.16 | 123.23 | 137.85 | 142.84 | 146.76 | 152.22 |
| 13.25 | 120.73 | 133.95 | 140.16 | 145.79 | 154.72 | 124.33 | 138.98 | 143.96 | 147.87 | 153.30 |
| 13.50 | 121.90 | 135.33 | 141.63 | 147.32 | 156.35 | 125.35 | 140.01 | 144.98 | 148.87 | 154.27 |
| 13.75 | 123.11 | 136.75 | 143.13 | 148.88 | 158.01 | 126.28 | 140.95 | 145.90 | 149.77 | 155.14 |
| 14.00 | 124.32 | 138.17 | 144.63 | 150.46 | 159.67 | 127.14 | 141.79 | 146.73 | 150.58 | 155.91 |
| 14.25 | 125.51 | 139.57 | 146.11 | 152.00 | 161.31 | 127.93 | 142.56 | 147.47 | 151.30 | 156.59 |
| 14.50 | 126.63 | 140.90 | 147.52 | 153.47 | 162.87 | 128.67 | 143.27 | 148.16 | 151.96 | 157.21 |
| 14.75 | 127.67 | 142.14 | 148.83 | 154.84 | 164.32 | 129.38 | 143.93 | 148.79 | 152.57 | 157.78 |
| 15.00 | 128.60 | 143.26 | 150.03 | 156.09 | 165.63 | 130.05 | 144.57 | 149.40 | 153.15 | 158.31 |
| 15.25 | 129.42 | 144.26 | 151.09 | 157.20 | 166.81 | 130.71 | 145.18 | 149.98 | 153.71 | 158.83 |
| 15.50 | 130.12 | 145.13 | 152.01 | 158.17 | 167.83 | 131.37 | 145.79 | 150.56 | 154.26 | 159.34 |
| 15.75 | 130.69 | 145.86 | 152.79 | 158.99 | 168.70 | 132.03 | 146.40 | 151.14 | 154.82 | 159.85 |
| 16.00 | 131.15 | 146.46 | 153.44 | 159.67 | 169.42 | 132.70 | 147.01 | 151.73 | 155.38 | 160.38 |
| 16.25 | 131.50 | 146.96 | 153.98 | 160.24 | 170.02 | 133.38 | 147.63 | 152.32 | 155.95 | 160.90 |

|       |        |        |        |        |        |        |        |        |        |        |
|-------|--------|--------|--------|--------|--------|--------|--------|--------|--------|--------|
| 16.50 | 131.77 | 147.35 | 154.42 | 160.70 | 170.50 | 134.06 | 148.26 | 152.92 | 156.52 | 161.44 |
| 16.75 | 131.96 | 147.66 | 154.76 | 161.06 | 170.89 | 134.75 | 148.89 | 153.53 | 157.11 | 161.98 |
| 17.00 | 132.07 | 147.89 | 155.02 | 161.34 | 171.19 | 135.44 | 149.53 | 154.14 | 157.69 | 162.54 |
| 17.25 | 132.12 | 148.05 | 155.21 | 161.54 | 171.40 | 136.15 | 150.18 | 154.76 | 158.29 | 163.10 |
| 17.50 | 132.12 | 148.15 | 155.33 | 161.68 | 171.54 | 136.86 | 150.83 | 155.39 | 158.89 | 163.66 |
| 17.75 | 132.06 | 148.19 | 155.40 | 161.75 | 171.62 | 137.57 | 151.49 | 156.02 | 159.50 | 164.23 |
| 18.00 | 131.98 | 148.21 | 155.43 | 161.80 | 171.66 | 138.29 | 152.14 | 156.65 | 160.11 | 164.80 |

|      | Weight |       |       |       |       |        |       |       |       |       |
|------|--------|-------|-------|-------|-------|--------|-------|-------|-------|-------|
|      | Male   |       |       |       |       | Female |       |       |       |       |
| Age  | C3     | C25   | C50   | C75   | C97   | C3     | C25   | C50   | C75   | C97   |
| 0.00 | 1.65   | 2.54  | 2.93  | 3.28  | 3.82  | 1.50   | 2.16  | 2.55  | 2.97  | 3.77  |
| 0.25 | 2.31   | 3.49  | 4.02  | 4.50  | 5.26  | 2.13   | 2.99  | 3.52  | 4.07  | 5.12  |
| 0.50 | 2.96   | 4.40  | 5.06  | 5.67  | 6.64  | 2.77   | 3.83  | 4.47  | 5.14  | 6.41  |
| 0.75 | 3.59   | 5.24  | 6.03  | 6.75  | 7.94  | 3.43   | 4.66  | 5.40  | 6.17  | 7.64  |
| 1.00 | 4.19   | 6.02  | 6.91  | 7.75  | 9.14  | 4.08   | 5.46  | 6.29  | 7.16  | 8.80  |
| 1.25 | 4.76   | 6.73  | 7.73  | 8.67  | 10.25 | 4.73   | 6.24  | 7.15  | 8.09  | 9.88  |
| 1.50 | 5.30   | 7.39  | 8.47  | 9.51  | 11.28 | 5.35   | 6.98  | 7.95  | 8.96  | 10.87 |
| 1.75 | 5.82   | 7.99  | 9.16  | 10.29 | 12.25 | 5.94   | 7.66  | 8.68  | 9.75  | 11.76 |
| 2.00 | 6.31   | 8.56  | 9.79  | 11.01 | 13.16 | 6.48   | 8.28  | 9.35  | 10.46 | 12.55 |
| 2.25 | 6.78   | 9.09  | 10.39 | 11.69 | 14.02 | 6.98   | 8.84  | 9.95  | 11.10 | 13.26 |
| 2.50 | 7.23   | 9.58  | 10.94 | 12.32 | 14.84 | 7.43   | 9.36  | 10.50 | 11.68 | 13.90 |
| 2.75 | 7.66   | 10.05 | 11.46 | 12.91 | 15.63 | 7.86   | 9.83  | 11.01 | 12.22 | 14.50 |
| 3.00 | 8.07   | 10.49 | 11.94 | 13.47 | 16.39 | 8.25   | 10.28 | 11.48 | 12.72 | 15.06 |
| 3.25 | 8.47   | 10.90 | 12.41 | 14.01 | 17.12 | 8.61   | 10.69 | 11.92 | 13.20 | 15.59 |
| 3.50 | 8.85   | 11.30 | 12.85 | 14.52 | 17.84 | 8.96   | 11.09 | 12.36 | 13.66 | 16.11 |
| 3.75 | 9.22   | 11.69 | 13.27 | 15.01 | 18.55 | 9.29   | 11.49 | 12.78 | 14.12 | 16.63 |
| 4.00 | 9.58   | 12.06 | 13.68 | 15.49 | 19.25 | 9.62   | 11.87 | 13.20 | 14.57 | 17.15 |
| 4.25 | 9.93   | 12.42 | 14.08 | 15.95 | 19.95 | 9.93   | 12.24 | 13.61 | 15.02 | 17.66 |
| 4.50 | 10.28  | 12.78 | 14.47 | 16.41 | 20.66 | 10.24  | 12.61 | 14.01 | 15.46 | 18.17 |
| 4.75 | 10.63  | 13.13 | 14.86 | 16.87 | 21.38 | 10.54  | 12.97 | 14.40 | 15.89 | 18.67 |
| 5.00 | 10.97  | 13.49 | 15.24 | 17.32 | 22.10 | 10.83  | 13.32 | 14.79 | 16.31 | 19.16 |
| 5.25 | 11.30  | 13.83 | 15.62 | 17.77 | 22.82 | 11.12  | 13.67 | 15.17 | 16.72 | 19.64 |
| 5.50 | 11.63  | 14.18 | 16.00 | 18.21 | 23.55 | 11.40  | 14.00 | 15.53 | 17.12 | 20.09 |
| 5.75 | 11.95  | 14.52 | 16.37 | 18.65 | 24.27 | 11.68  | 14.33 | 15.89 | 17.51 | 20.54 |
| 6.00 | 12.27  | 14.86 | 16.75 | 19.09 | 25.00 | 11.96  | 14.65 | 16.24 | 17.89 | 20.98 |
| 6.25 | 12.59  | 15.21 | 17.13 | 19.54 | 25.73 | 12.24  | 14.98 | 16.60 | 18.28 | 21.42 |
| 6.50 | 12.91  | 15.57 | 17.53 | 20.00 | 26.47 | 12.53  | 15.32 | 16.97 | 18.68 | 21.88 |
| 6.75 | 13.24  | 15.94 | 17.94 | 20.48 | 27.23 | 12.83  | 15.68 | 17.36 | 19.10 | 22.35 |
| 7.00 | 13.59  | 16.33 | 18.38 | 20.99 | 28.00 | 13.15  | 16.05 | 17.76 | 19.54 | 22.86 |
| 7.25 | 13.95  | 16.74 | 18.84 | 21.52 | 28.78 | 13.48  | 16.45 | 18.20 | 20.02 | 23.42 |
| 7.50 | 14.32  | 17.18 | 19.33 | 22.09 | 29.59 | 13.82  | 16.87 | 18.67 | 20.54 | 24.03 |
| 7.75 | 14.71  | 17.65 | 19.86 | 22.69 | 30.42 | 14.18  | 17.33 | 19.18 | 21.10 | 24.70 |
| 8.00 | 15.13  | 18.15 | 20.42 | 23.33 | 31.27 | 14.56  | 17.80 | 19.72 | 21.71 | 25.43 |
| 8.25 | 15.57  | 18.68 | 21.02 | 24.02 | 32.14 | 14.94  | 18.31 | 20.30 | 22.36 | 26.23 |
| 8.50 | 16.03  | 19.25 | 21.66 | 24.74 | 33.04 | 15.33  | 18.84 | 20.91 | 23.06 | 27.10 |
| 8.75 | 16.50  | 19.84 | 22.34 | 25.50 | 33.95 | 15.72  | 19.38 | 21.55 | 23.80 | 28.03 |

|       |       |       |       |       |       |       |       |       |       |       |
|-------|-------|-------|-------|-------|-------|-------|-------|-------|-------|-------|
| 9.00  | 16.99 | 20.46 | 23.03 | 26.29 | 34.87 | 16.11 | 19.95 | 22.22 | 24.59 | 29.03 |
| 9.25  | 17.48 | 21.09 | 23.75 | 27.09 | 35.79 | 16.50 | 20.53 | 22.92 | 25.41 | 30.09 |
| 9.50  | 17.98 | 21.73 | 24.48 | 27.91 | 36.71 | 16.88 | 21.12 | 23.65 | 26.27 | 31.22 |
| 9.75  | 18.47 | 22.37 | 25.22 | 28.74 | 37.62 | 17.27 | 21.74 | 24.40 | 27.17 | 32.40 |
| 10.00 | 18.96 | 23.02 | 25.96 | 29.57 | 38.52 | 17.65 | 22.36 | 25.18 | 28.11 | 33.65 |
| 10.25 | 19.45 | 23.67 | 26.71 | 30.41 | 39.41 | 18.04 | 23.01 | 25.98 | 29.09 | 34.96 |
| 10.50 | 19.93 | 24.33 | 27.46 | 31.24 | 40.30 | 18.43 | 23.67 | 26.81 | 30.09 | 36.31 |
| 10.75 | 20.41 | 24.98 | 28.21 | 32.07 | 41.19 | 18.83 | 24.35 | 27.67 | 31.13 | 37.71 |
| 11.00 | 20.88 | 25.63 | 28.96 | 32.91 | 42.08 | 19.25 | 25.05 | 28.54 | 32.20 | 39.14 |
| 11.25 | 21.36 | 26.29 | 29.71 | 33.75 | 42.99 | 19.68 | 25.77 | 29.44 | 33.28 | 40.59 |
| 11.50 | 21.84 | 26.95 | 30.48 | 34.60 | 43.91 | 20.14 | 26.50 | 30.34 | 34.38 | 42.05 |
| 11.75 | 22.32 | 27.62 | 31.25 | 35.46 | 44.85 | 20.61 | 27.25 | 31.26 | 35.47 | 43.50 |
| 12.00 | 22.82 | 28.31 | 32.04 | 36.34 | 45.81 | 21.12 | 28.01 | 32.18 | 36.56 | 44.93 |
| 12.25 | 23.32 | 29.01 | 32.84 | 37.24 | 46.81 | 21.65 | 28.78 | 33.10 | 37.64 | 46.31 |
| 12.50 | 23.84 | 29.72 | 33.66 | 38.15 | 47.84 | 22.22 | 29.57 | 34.02 | 38.71 | 47.65 |
| 12.75 | 24.38 | 30.46 | 34.51 | 39.10 | 48.91 | 22.82 | 30.37 | 34.94 | 39.75 | 48.93 |
| 13.00 | 24.93 | 31.22 | 35.38 | 40.07 | 50.01 | 23.47 | 31.18 | 35.85 | 40.77 | 50.15 |
| 13.25 | 25.50 | 32.00 | 36.27 | 41.07 | 51.16 | 24.17 | 32.01 | 36.76 | 41.75 | 51.28 |
| 13.50 | 26.08 | 32.80 | 37.20 | 42.10 | 52.33 | 24.92 | 32.85 | 37.65 | 42.70 | 52.33 |
| 13.75 | 26.68 | 33.63 | 38.14 | 43.16 | 53.54 | 25.72 | 33.71 | 38.54 | 43.62 | 53.29 |
| 14.00 | 27.28 | 34.47 | 39.12 | 44.25 | 54.78 | 26.57 | 34.59 | 39.42 | 44.49 | 54.15 |
| 14.25 | 27.89 | 35.33 | 40.11 | 45.35 | 56.04 | 27.48 | 35.48 | 40.29 | 45.33 | 54.93 |
| 14.50 | 28.51 | 36.20 | 41.11 | 46.47 | 57.31 | 28.45 | 36.38 | 41.15 | 46.14 | 55.61 |
| 14.75 | 29.12 | 37.08 | 42.12 | 47.60 | 58.57 | 29.47 | 37.31 | 42.00 | 46.90 | 56.20 |
| 15.00 | 29.72 | 37.96 | 43.13 | 48.73 | 59.84 | 30.54 | 38.24 | 42.84 | 47.64 | 56.72 |
| 15.25 | 30.31 | 38.84 | 44.15 | 49.86 | 61.09 | 31.66 | 39.19 | 43.68 | 48.35 | 57.17 |
| 15.50 | 30.88 | 39.71 | 45.16 | 50.98 | 62.33 | 32.82 | 40.16 | 44.52 | 49.05 | 57.58 |
| 15.75 | 31.44 | 40.57 | 46.16 | 52.09 | 63.54 | 34.00 | 41.13 | 45.35 | 49.73 | 57.96 |
| 16.00 | 31.97 | 41.43 | 47.15 | 53.19 | 64.73 | 35.21 | 42.11 | 46.18 | 50.40 | 58.30 |
| 16.25 | 32.48 | 42.27 | 48.14 | 54.28 | 65.90 | 36.44 | 43.10 | 47.01 | 51.07 | 58.64 |
| 16.50 | 32.97 | 43.11 | 49.12 | 55.36 | 67.05 | 37.67 | 44.08 | 47.84 | 51.73 | 58.97 |
| 16.75 | 33.43 | 43.93 | 50.09 | 56.42 | 68.18 | 38.90 | 45.07 | 48.67 | 52.39 | 59.30 |
| 17.00 | 33.87 | 44.75 | 51.05 | 57.48 | 69.30 | 40.13 | 46.05 | 49.50 | 53.05 | 59.65 |
| 17.25 | 34.29 | 45.56 | 52.00 | 58.53 | 70.40 | 41.35 | 47.03 | 50.33 | 53.72 | 60.00 |
| 17.50 | 34.68 | 46.37 | 52.95 | 59.57 | 71.49 | 42.56 | 48.00 | 51.15 | 54.39 | 60.37 |
| 17.75 | 35.06 | 47.17 | 53.90 | 60.61 | 72.57 | 43.76 | 48.97 | 51.98 | 55.07 | 60.77 |
| 18.00 | 35.41 | 47.96 | 54.85 | 61.65 | 73.65 | 44.95 | 49.93 | 52.81 | 55.75 | 61.17 |

| Age  | BMI   |       |       |       |       |         |       |       |       |       |
|------|-------|-------|-------|-------|-------|---------|-------|-------|-------|-------|
|      | Males |       |       |       |       | Females |       |       |       |       |
|      | C3    | C25   | C50   | C75   | C97   | C3      | C25   | C50   | C75   | C97   |
| 0.00 | 9.75  | 11.83 | 12.55 | 13.31 | 16.03 | 8.90    | 11.08 | 12.49 | 14.07 | 17.35 |
| 0.25 | 10.32 | 12.45 | 13.21 | 14.01 | 16.83 | 9.76    | 11.84 | 13.20 | 14.71 | 17.89 |
| 0.50 | 10.85 | 13.01 | 13.81 | 14.65 | 17.56 | 10.57   | 12.56 | 13.85 | 15.30 | 18.35 |
| 0.75 | 11.30 | 13.49 | 14.31 | 15.19 | 18.18 | 11.31   | 13.20 | 14.43 | 15.81 | 18.73 |
| 1.00 | 11.67 | 13.87 | 14.72 | 15.63 | 18.67 | 11.96   | 13.75 | 14.91 | 16.22 | 19.00 |
| 1.25 | 11.97 | 14.16 | 15.03 | 15.97 | 19.04 | 12.51   | 14.19 | 15.30 | 16.53 | 19.16 |

|       |       |       |       |       |       |       |       |       |       |       |
|-------|-------|-------|-------|-------|-------|-------|-------|-------|-------|-------|
| 1.50  | 12.20 | 14.38 | 15.26 | 16.22 | 19.32 | 12.94 | 14.54 | 15.58 | 16.74 | 19.22 |
| 1.75  | 12.37 | 14.52 | 15.42 | 16.40 | 19.51 | 13.27 | 14.77 | 15.75 | 16.85 | 19.19 |
| 2.00  | 12.49 | 14.62 | 15.53 | 16.52 | 19.64 | 13.48 | 14.90 | 15.82 | 16.85 | 19.06 |
| 2.25  | 12.57 | 14.68 | 15.59 | 16.59 | 19.71 | 13.60 | 14.94 | 15.81 | 16.79 | 18.87 |
| 2.50  | 12.63 | 14.70 | 15.62 | 16.63 | 19.75 | 13.65 | 14.92 | 15.74 | 16.67 | 18.64 |
| 2.75  | 12.67 | 14.70 | 15.63 | 16.64 | 19.76 | 13.65 | 14.86 | 15.64 | 16.52 | 18.40 |
| 3.00  | 12.69 | 14.69 | 15.62 | 16.65 | 19.76 | 13.61 | 14.77 | 15.52 | 16.36 | 18.17 |
| 3.25  | 12.70 | 14.67 | 15.60 | 16.63 | 19.74 | 13.56 | 14.67 | 15.39 | 16.21 | 17.96 |
| 3.50  | 12.69 | 14.63 | 15.57 | 16.60 | 19.71 | 13.50 | 14.58 | 15.28 | 16.07 | 17.79 |
| 3.75  | 12.67 | 14.59 | 15.52 | 16.56 | 19.66 | 13.45 | 14.51 | 15.19 | 15.97 | 17.66 |
| 4.00  | 12.65 | 14.53 | 15.47 | 16.51 | 19.61 | 13.42 | 14.45 | 15.13 | 15.91 | 17.59 |
| 4.25  | 12.62 | 14.47 | 15.41 | 16.46 | 19.55 | 13.40 | 14.42 | 15.10 | 15.87 | 17.56 |
| 4.50  | 12.58 | 14.40 | 15.34 | 16.40 | 19.49 | 13.38 | 14.41 | 15.09 | 15.86 | 17.56 |
| 4.75  | 12.53 | 14.34 | 15.27 | 16.34 | 19.43 | 13.38 | 14.41 | 15.09 | 15.87 | 17.60 |
| 5.00  | 12.49 | 14.27 | 15.21 | 16.27 | 19.37 | 13.38 | 14.41 | 15.10 | 15.89 | 17.65 |
| 5.25  | 12.44 | 14.20 | 15.14 | 16.21 | 19.31 | 13.37 | 14.41 | 15.10 | 15.90 | 17.71 |
| 5.50  | 12.40 | 14.13 | 15.08 | 16.15 | 19.26 | 13.35 | 14.40 | 15.10 | 15.91 | 17.75 |
| 5.75  | 12.36 | 14.08 | 15.02 | 16.10 | 19.21 | 13.31 | 14.37 | 15.08 | 15.90 | 17.78 |
| 6.00  | 12.33 | 14.03 | 14.97 | 16.06 | 19.18 | 13.27 | 14.33 | 15.04 | 15.88 | 17.80 |
| 6.25  | 12.30 | 13.99 | 14.94 | 16.04 | 19.17 | 13.21 | 14.28 | 15.00 | 15.85 | 17.81 |
| 6.50  | 12.29 | 13.96 | 14.92 | 16.03 | 19.18 | 13.15 | 14.23 | 14.96 | 15.82 | 17.83 |
| 6.75  | 12.29 | 13.95 | 14.91 | 16.03 | 19.21 | 13.10 | 14.19 | 14.93 | 15.80 | 17.85 |
| 7.00  | 12.29 | 13.96 | 14.92 | 16.05 | 19.25 | 13.06 | 14.16 | 14.92 | 15.81 | 17.90 |
| 7.25  | 12.32 | 13.98 | 14.95 | 16.09 | 19.32 | 13.05 | 14.17 | 14.94 | 15.84 | 18.00 |
| 7.50  | 12.35 | 14.01 | 15.00 | 16.15 | 19.42 | 13.07 | 14.21 | 14.99 | 15.92 | 18.14 |
| 7.75  | 12.41 | 14.07 | 15.07 | 16.24 | 19.54 | 13.11 | 14.28 | 15.08 | 16.04 | 18.33 |
| 8.00  | 12.49 | 14.16 | 15.17 | 16.37 | 19.72 | 13.18 | 14.37 | 15.20 | 16.19 | 18.57 |
| 8.25  | 12.60 | 14.29 | 15.31 | 16.53 | 19.94 | 13.26 | 14.48 | 15.34 | 16.36 | 18.84 |
| 8.50  | 12.74 | 14.45 | 15.49 | 16.74 | 20.20 | 13.34 | 14.61 | 15.49 | 16.56 | 19.15 |
| 8.75  | 12.90 | 14.63 | 15.70 | 16.97 | 20.51 | 13.43 | 14.74 | 15.65 | 16.76 | 19.47 |
| 9.00  | 13.07 | 14.83 | 15.92 | 17.22 | 20.84 | 13.51 | 14.86 | 15.81 | 16.96 | 19.81 |
| 9.25  | 13.25 | 15.04 | 16.16 | 17.49 | 21.18 | 13.56 | 14.96 | 15.95 | 17.15 | 20.15 |
| 9.50  | 13.43 | 15.25 | 16.39 | 17.75 | 21.52 | 13.60 | 15.05 | 16.08 | 17.33 | 20.48 |
| 9.75  | 13.60 | 15.45 | 16.62 | 18.01 | 21.86 | 13.64 | 15.13 | 16.20 | 17.50 | 20.81 |
| 10.00 | 13.76 | 15.64 | 16.83 | 18.25 | 22.17 | 13.66 | 15.21 | 16.32 | 17.68 | 21.14 |
| 10.25 | 13.90 | 15.80 | 17.02 | 18.47 | 22.46 | 13.69 | 15.29 | 16.44 | 17.85 | 21.47 |
| 10.50 | 14.02 | 15.95 | 17.18 | 18.67 | 22.72 | 13.72 | 15.37 | 16.56 | 18.02 | 21.78 |
| 10.75 | 14.12 | 16.08 | 17.33 | 18.84 | 22.96 | 13.77 | 15.47 | 16.69 | 18.20 | 22.09 |
| 11.00 | 14.21 | 16.19 | 17.46 | 19.00 | 23.17 | 13.82 | 15.57 | 16.83 | 18.39 | 22.38 |
| 11.25 | 14.28 | 16.28 | 17.58 | 19.14 | 23.36 | 13.89 | 15.69 | 16.99 | 18.58 | 22.66 |
| 11.50 | 14.34 | 16.36 | 17.67 | 19.26 | 23.53 | 13.98 | 15.83 | 17.15 | 18.78 | 22.92 |
| 11.75 | 14.39 | 16.42 | 17.76 | 19.36 | 23.68 | 14.08 | 15.98 | 17.33 | 18.98 | 23.15 |
| 12.00 | 14.42 | 16.48 | 17.83 | 19.45 | 23.82 | 14.20 | 16.13 | 17.51 | 19.18 | 23.35 |
| 12.25 | 14.45 | 16.52 | 17.89 | 19.54 | 23.94 | 14.33 | 16.30 | 17.69 | 19.38 | 23.53 |
| 12.50 | 14.47 | 16.56 | 17.95 | 19.62 | 24.06 | 14.47 | 16.48 | 17.89 | 19.58 | 23.68 |
| 12.75 | 14.50 | 16.61 | 18.01 | 19.70 | 24.19 | 14.62 | 16.66 | 18.08 | 19.78 | 23.81 |
| 13.00 | 14.52 | 16.65 | 18.07 | 19.78 | 24.32 | 14.78 | 16.85 | 18.27 | 19.97 | 23.92 |

|       |       |       |       |       |       |       |       |       |       |       |
|-------|-------|-------|-------|-------|-------|-------|-------|-------|-------|-------|
| 13.25 | 14.56 | 16.71 | 18.15 | 19.89 | 24.47 | 14.95 | 17.04 | 18.47 | 20.15 | 24.01 |
| 13.50 | 14.61 | 16.79 | 18.25 | 20.01 | 24.65 | 15.13 | 17.24 | 18.66 | 20.33 | 24.08 |
| 13.75 | 14.69 | 16.90 | 18.38 | 20.17 | 24.86 | 15.31 | 17.43 | 18.85 | 20.49 | 24.13 |
| 14.00 | 14.78 | 17.02 | 18.53 | 20.35 | 25.12 | 15.50 | 17.63 | 19.04 | 20.65 | 24.16 |
| 14.25 | 14.89 | 17.18 | 18.71 | 20.57 | 25.41 | 15.70 | 17.83 | 19.22 | 20.79 | 24.17 |
| 14.50 | 15.02 | 17.35 | 18.92 | 20.81 | 25.73 | 15.90 | 18.02 | 19.39 | 20.93 | 24.17 |
| 14.75 | 15.17 | 17.54 | 19.14 | 21.07 | 26.07 | 16.10 | 18.21 | 19.55 | 21.04 | 24.14 |
| 15.00 | 15.32 | 17.74 | 19.37 | 21.35 | 26.44 | 16.31 | 18.39 | 19.71 | 21.15 | 24.10 |
| 15.25 | 15.48 | 17.95 | 19.62 | 21.64 | 26.82 | 16.52 | 18.57 | 19.86 | 21.25 | 24.06 |
| 15.50 | 15.63 | 18.16 | 19.87 | 21.93 | 27.20 | 16.74 | 18.76 | 20.00 | 21.35 | 24.02 |
| 15.75 | 15.79 | 18.36 | 20.11 | 22.22 | 27.58 | 16.96 | 18.94 | 20.15 | 21.44 | 23.98 |
| 16.00 | 15.94 | 18.57 | 20.35 | 22.50 | 27.95 | 17.18 | 19.12 | 20.29 | 21.54 | 23.94 |
| 16.25 | 16.07 | 18.76 | 20.58 | 22.78 | 28.31 | 17.40 | 19.29 | 20.43 | 21.62 | 23.90 |
| 16.50 | 16.20 | 18.94 | 20.80 | 23.04 | 28.66 | 17.60 | 19.45 | 20.55 | 21.69 | 23.86 |
| 16.75 | 16.32 | 19.11 | 21.01 | 23.29 | 28.99 | 17.80 | 19.60 | 20.66 | 21.75 | 23.81 |
| 17.00 | 16.42 | 19.27 | 21.20 | 23.52 | 29.30 | 17.99 | 19.74 | 20.75 | 21.80 | 23.76 |
| 17.25 | 16.52 | 19.42 | 21.39 | 23.76 | 29.61 | 18.17 | 19.86 | 20.84 | 21.85 | 23.70 |
| 17.50 | 16.62 | 19.57 | 21.58 | 23.99 | 29.92 | 18.34 | 19.98 | 20.93 | 21.89 | 23.65 |
| 17.75 | 16.71 | 19.72 | 21.77 | 24.22 | 30.23 | 18.50 | 20.09 | 21.00 | 21.92 | 23.59 |
| 18.00 | 16.80 | 19.87 | 21.95 | 24.45 | 30.53 | 18.66 | 20.20 | 21.07 | 21.95 | 23.54 |
